# Supplementary material
Source: publisher site journal article supplement (https://www.dovepress.com/article/384608)
Supplement: Supplementary file 1 [file get_supplementary_file.php]

SUPPLEMENTARY 1 – QUESTIONNAIRE

*Name*

*Title*

*Hospital*

*E-mail*

*Telephone number*

**The following questions relate to the competencies present in the emergency department**

|                                                                       | <i>How many doctors are employed in the emergency department within the following categories? Answer 999 if you do not know the answer.</i> | <i>How many of these can perform thoracentesis independently? (If uncertain, please give your best estimate). Answer 999 if you do not know the answer.</i> |
|-----------------------------------------------------------------------|---------------------------------------------------------------------------------------------------------------------------------------------|-------------------------------------------------------------------------------------------------------------------------------------------------------------|
| Consultants in emergency medicine                                     |                                                                                                                                             |                                                                                                                                                             |
| Consultants in another speciality working in the emergency department |                                                                                                                                             |                                                                                                                                                             |
| Specialist registrars                                                 |                                                                                                                                             |                                                                                                                                                             |
| Senior house officers                                                 |                                                                                                                                             |                                                                                                                                                             |
| House officers                                                        |                                                                                                                                             |                                                                                                                                                             |
| Others                                                                |                                                                                                                                             |                                                                                                                                                             |

**The following questions relate to thoracentesis training in the emergency department**

*What kind of thoracentesis training takes place in the emergency department? (I.e., in addition to the mandatory course as part of the emergency medicine core curriculum or the Emergency Medicine Core Competency course.)*

A formalized training programme is defined as being structured and scheduled training for physicians in the department.

*Formalized training programme*

*Yes*

*No*

*If no - Is there an intention to establish a formalized training programme?*

*Yes – describe*

*No*

*Informal training (e.g., bedside thoracentesis)*

*Yes*

*No*

*How does the informal training take place?*

*Bedside thoracentesis*

*Other – describe*

*Is there a specific number of supervised procedures required before a physician is allowed to perform the thoracentesis independently?*

*Yes – how many?*

*No*

*Does the department have guidelines for thoracentesis procedures?*

*Yes*

*No*

*Please attach the guideline*

**The following questions relate to the formalized training program**

*What does the training consist of?*

*E-learning*

*Individual hands-on teaching*

*Classroom teaching*

*Other – describe*

*Please attach the course manual*

*What are the number of hours allocated to training?*

*Where does the training take place?*

*In the department*

*In a simulation centre*

*Other – describe*

*How is the theoretical knowledge being disseminated?*

*Written material*

*E-learning*

*Classroom teaching*

*Which format is used for training?*

*Other – describe*

*E-learning*

*Virtual Reality*

*Classroom teaching*

*Manikins*

*Pigs*

*Other – describe*

*Is any formal assessment of skills conducted?*

*Continuous observation*

*Skills test*

*Other - describe*

*Is a checklist used for the “continuous observation” assessment?*

*Yes*

*No*

*Is a checklist used for the “Skills test” assessment?*

*Yes*

*No*

*Please attach the checklist*

*Any requirements to maintaining skills*

*Yes*

*No*
